# Supplementary material for: Effective Synthesis and Antifouling Activity of Dolastatin 16 Derivatives
Source: MDPI journal article supplement (doi:10.3390/md20020124), 2022-02-04

# Effective Synthesis and Antifouling Activity of Dolastatin 16 Derivatives

**Loida O. Casalme<sup>1</sup>, Keisuke Katayama<sup>1</sup>, Yoshiki Hayakawa<sup>1</sup>, Kensuke Nakamura<sup>1</sup>, Arisa Yamauchi<sup>1</sup>, Yasuyuki Nogata<sup>2</sup>, Erina Yoshimura<sup>3</sup>, Fuyuhiko Matsuda<sup>1</sup>, Taiki Umezawa<sup>1\*</sup>**

<sup>1</sup>Division of Environmental Materials Science, Graduate School of Environmental Science, Hokkaido University, N10W5 Sapporo 060-0810, Japan, e-mail: umezawa@ees.hokudai.ac.jp,

<sup>2</sup>Sustainable System Research Laboratory, Central Research Institute of Electric Power Industry, 1646 Abiko, Abiko, Chiba 270-1194, Japan

<sup>3</sup>CERES, Inc., 1-4-5 Midori, Abiko, Chiba 270-1153, Japan

## Table of Contents

|                                                                                  |    |
|----------------------------------------------------------------------------------|----|
| Figure S1. <sup>1</sup> H and <sup>13</sup> C NMR spectra of compound <b>5</b>   | 2  |
| Figure S2. <sup>1</sup> H and <sup>13</sup> C NMR spectra of compound <b>6</b>   | 3  |
| Figure S3. <sup>1</sup> H and <sup>13</sup> C NMR spectra of compound <b>8</b>   | 4  |
| Figure S4. <sup>1</sup> H and <sup>13</sup> C NMR spectra of compound <b>13</b>  | 5  |
| Figure S5. <sup>1</sup> H and <sup>13</sup> C NMR spectra of compound <b>14</b>  | 6  |
| Figure S6. <sup>1</sup> H and <sup>13</sup> C NMR spectra of compound <b>16</b>  | 7  |
| Figure S7. <sup>1</sup> H and <sup>13</sup> C NMR spectra of compound <b>17</b>  | 8  |
| Figure S8. <sup>1</sup> H and <sup>13</sup> C NMR spectra of compound <b>20</b>  | 9  |
| Figure S9. <sup>1</sup> H and <sup>13</sup> C NMR spectra of compound <b>21</b>  | 10 |
| Figure S10. <sup>1</sup> H and <sup>13</sup> C NMR spectra of compound <b>22</b> | 11 |
| Figure S11. <sup>1</sup> H and <sup>13</sup> C NMR spectra of compound <b>23</b> | 12 |
| Figure S12. <sup>1</sup> H and <sup>13</sup> C NMR spectra of compound <b>24</b> | 13 |
| Figure S13. <sup>1</sup> H and <sup>13</sup> C NMR spectra of compound <b>25</b> | 14 |
| Figure S14. <sup>1</sup> H and <sup>13</sup> C NMR spectra of compound <b>29</b> | 15 |

**Figure S1.** <sup>1</sup>H and <sup>13</sup>C NMR spectra of compound **5**

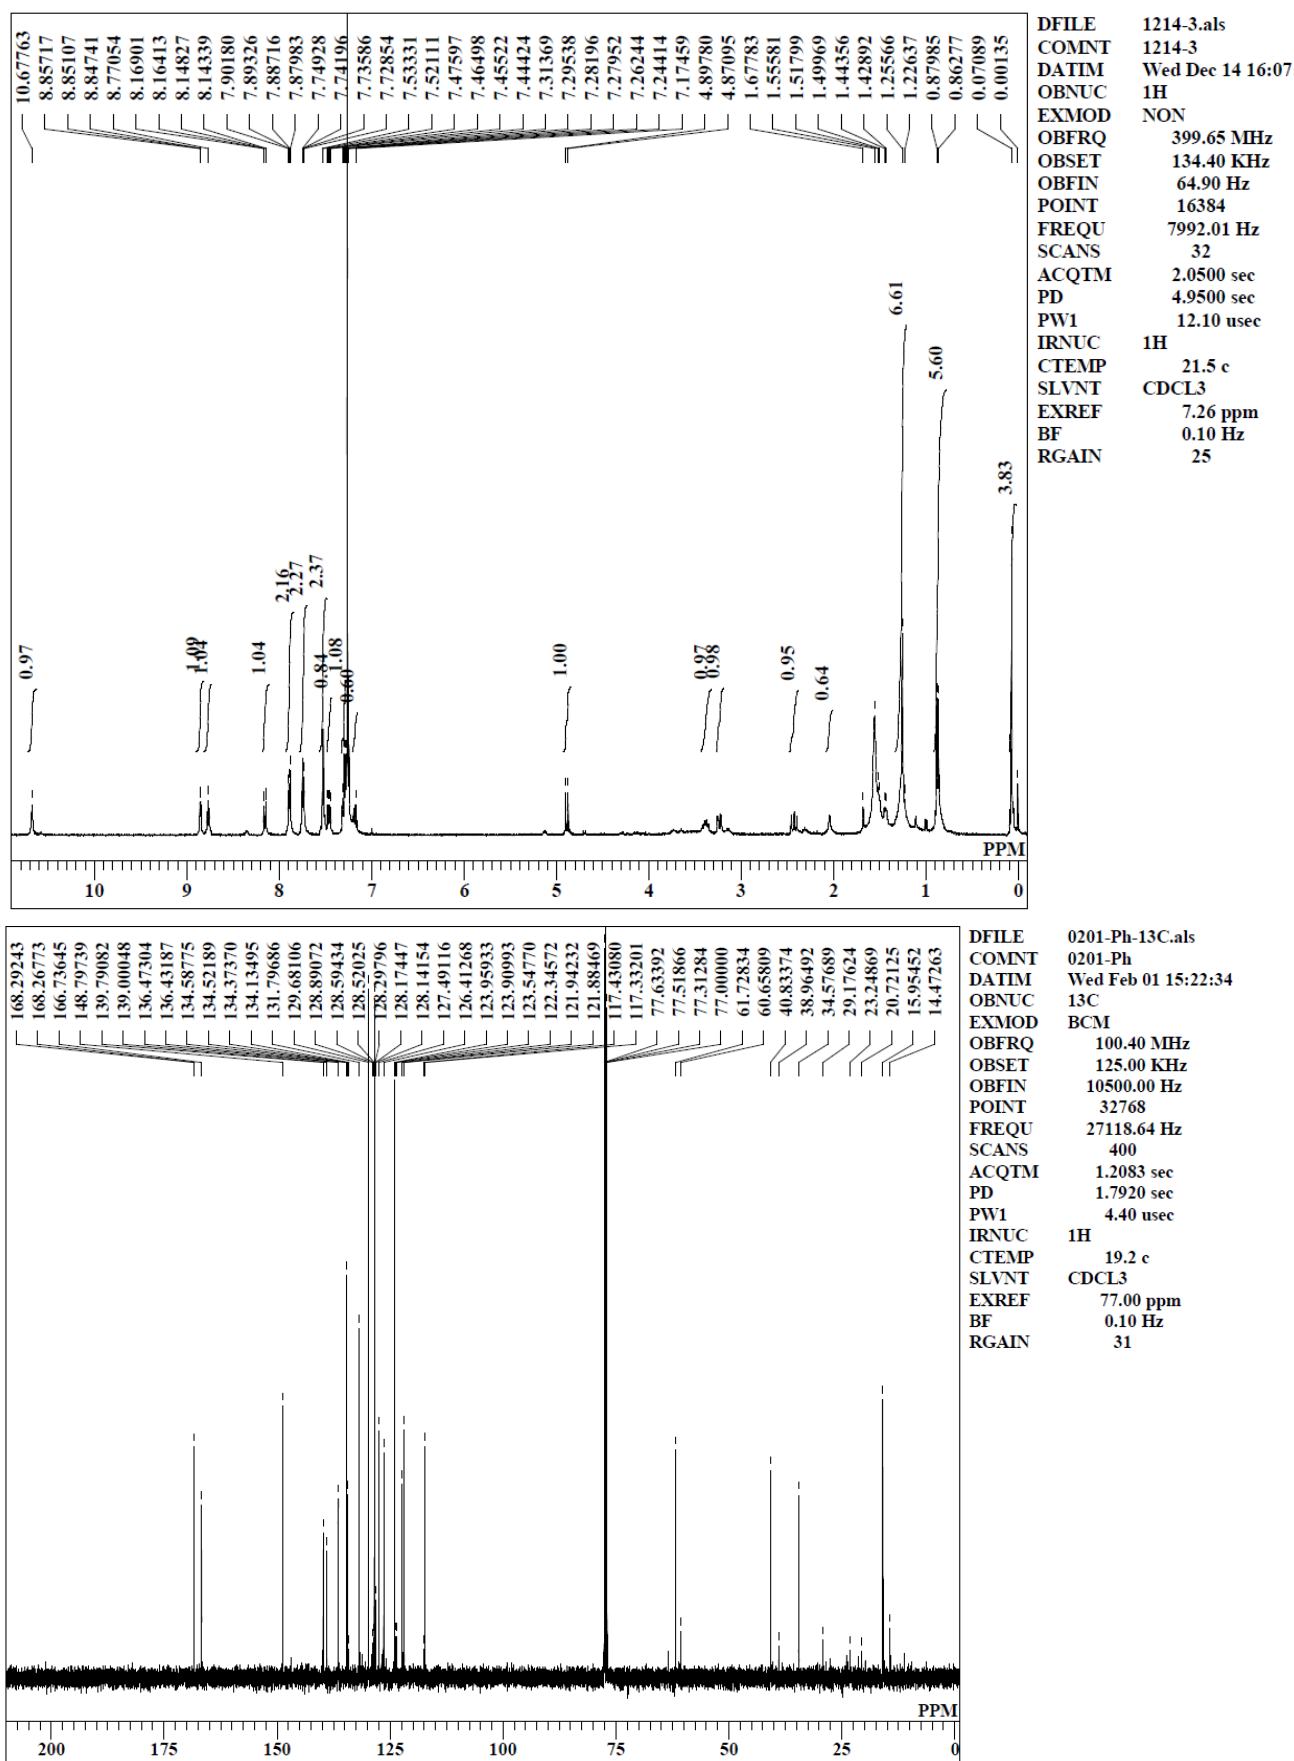

Figure S2. <sup>1</sup>H and <sup>13</sup>C NMR spectra of compound 6

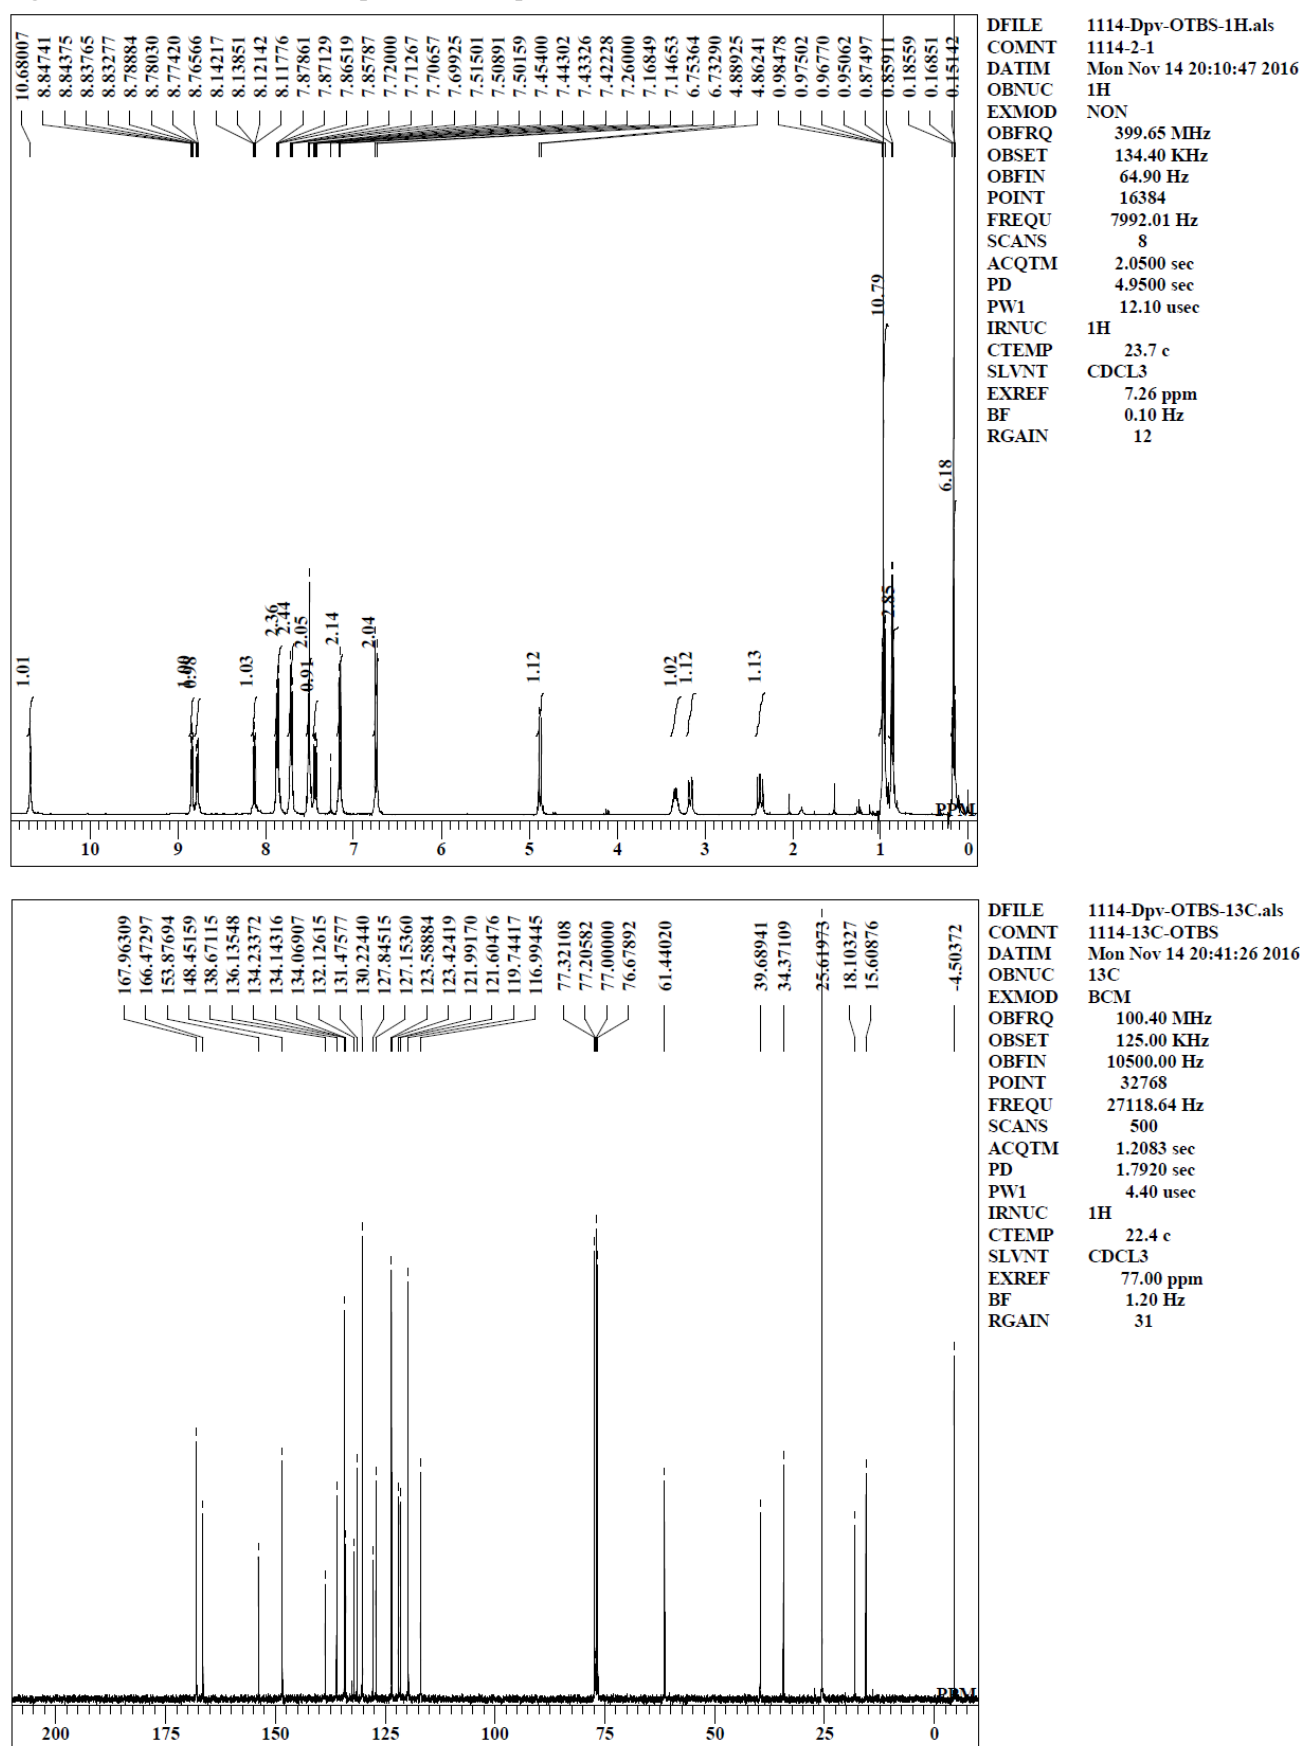

**Figure S3.** <sup>1</sup>H and <sup>13</sup>C NMR spectra of compound **8**

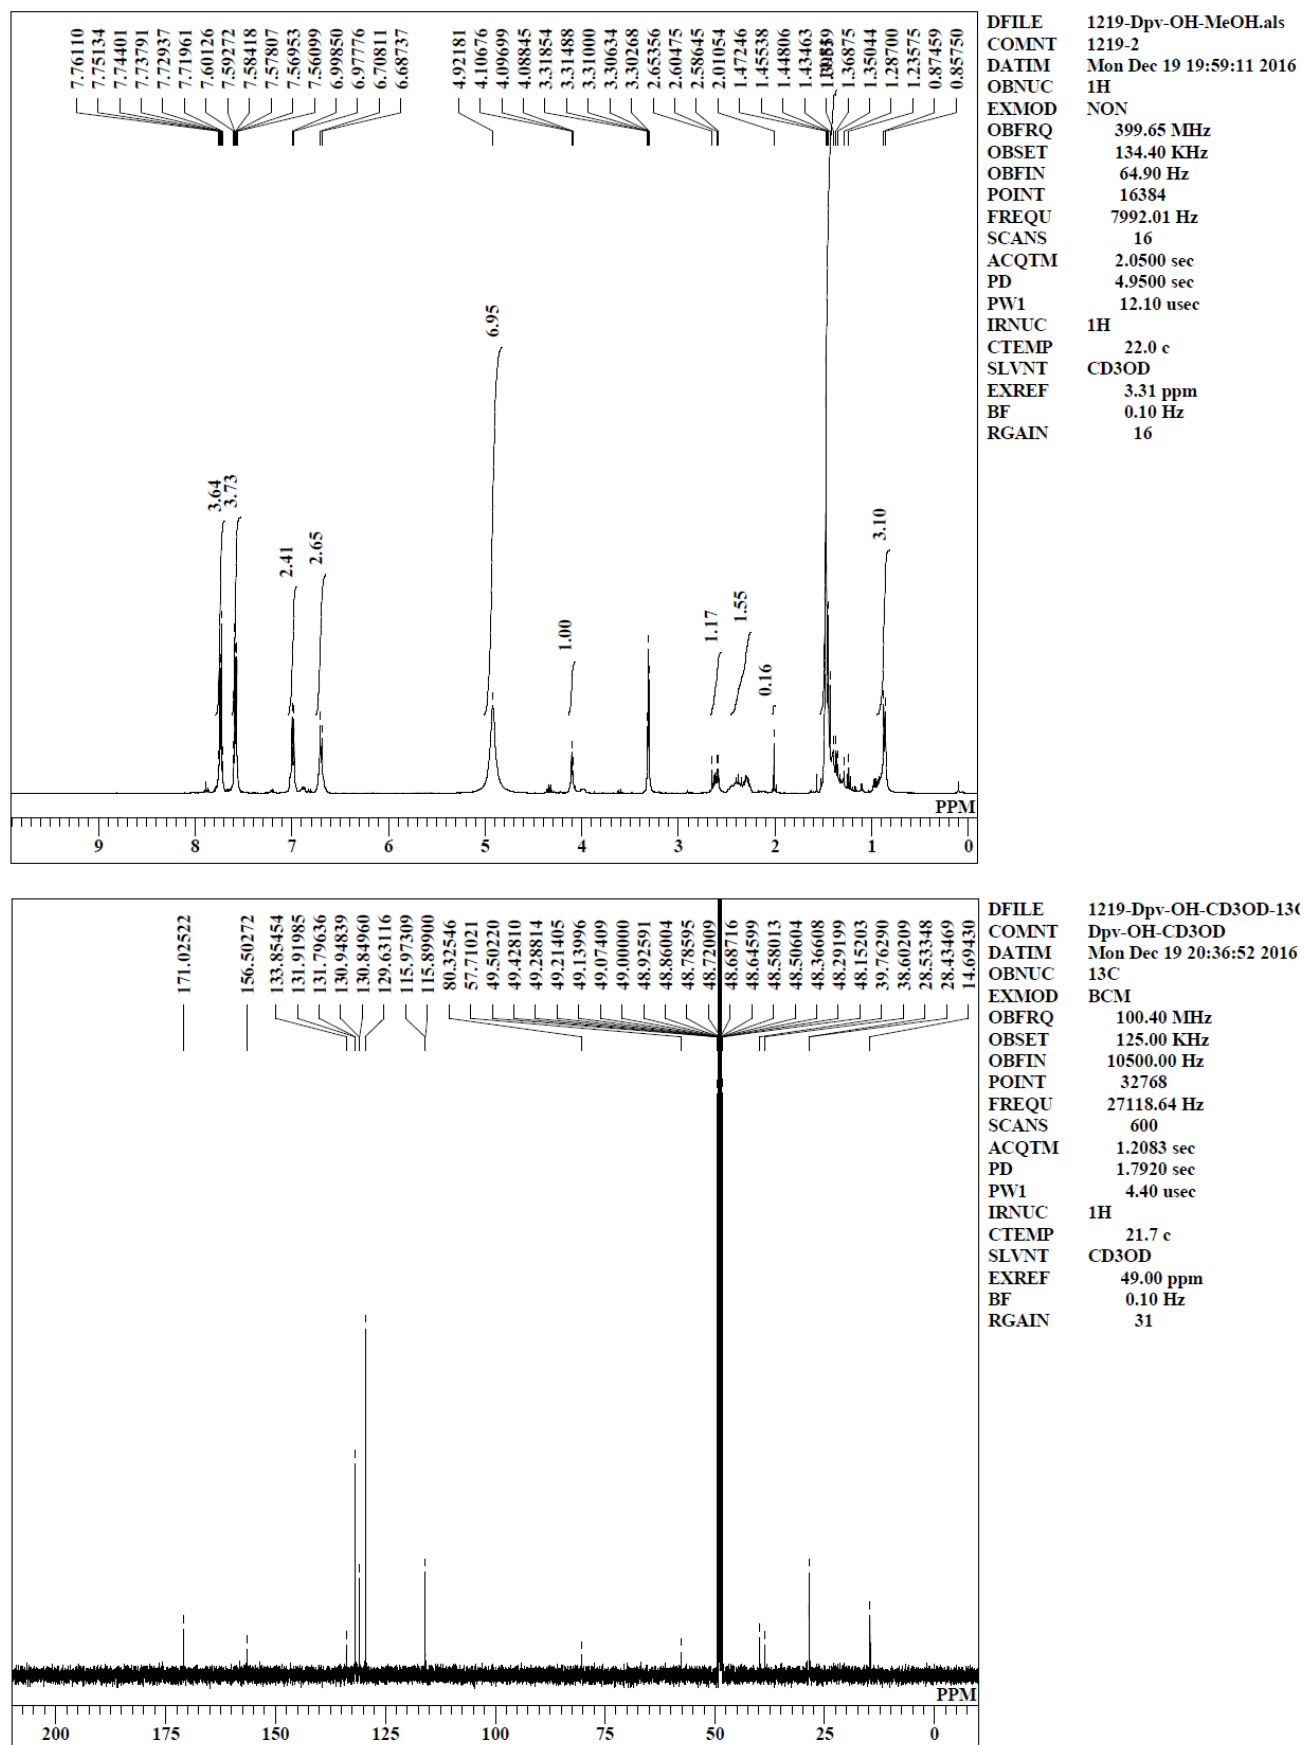

**Figure S4.**  $^1\text{H}$  and  $^{13}\text{C}$  NMR spectra of compound **13**

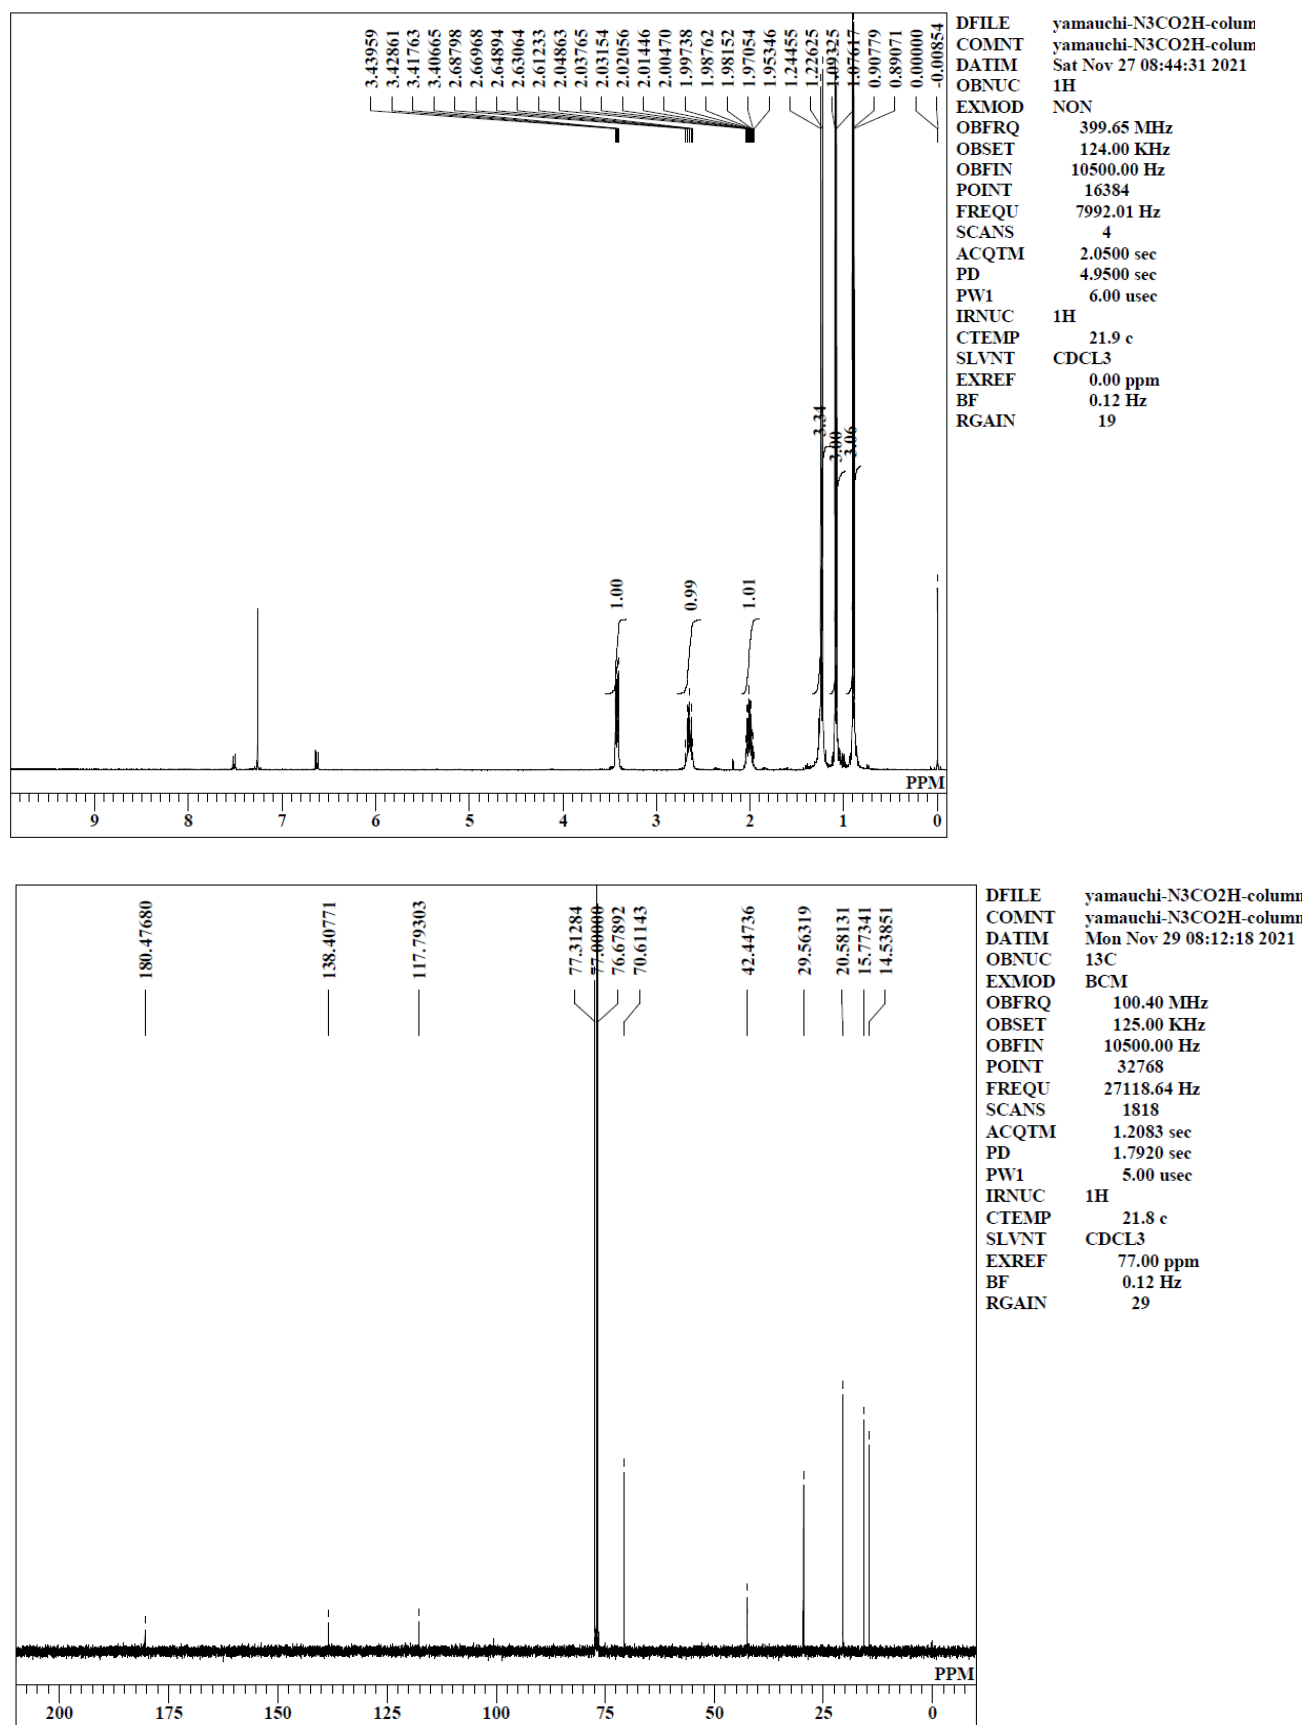

Figure S5. <sup>1</sup>H and <sup>13</sup>C NMR spectra of compound 14

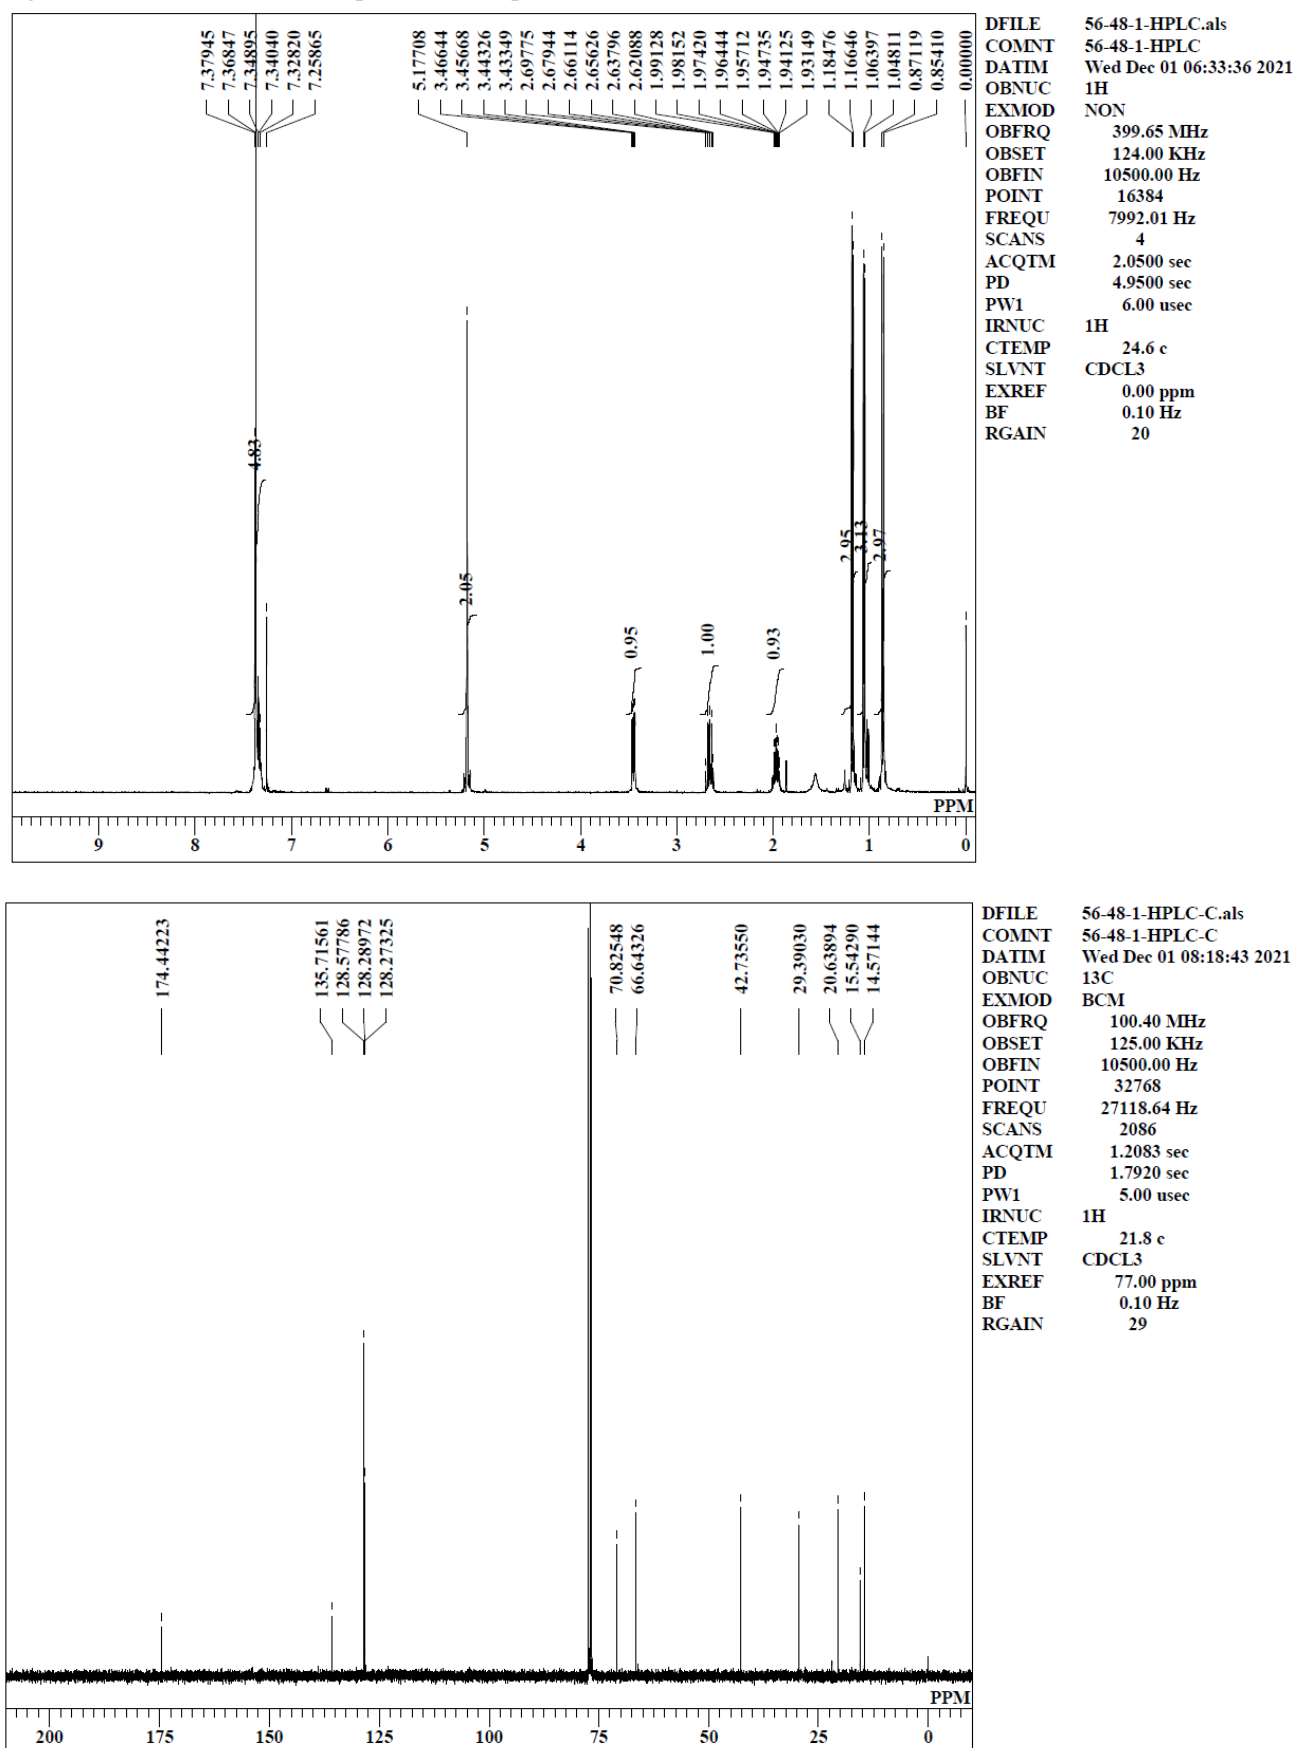

**Figure S6.** <sup>1</sup>H and <sup>13</sup>C NMR spectra of compound **16**

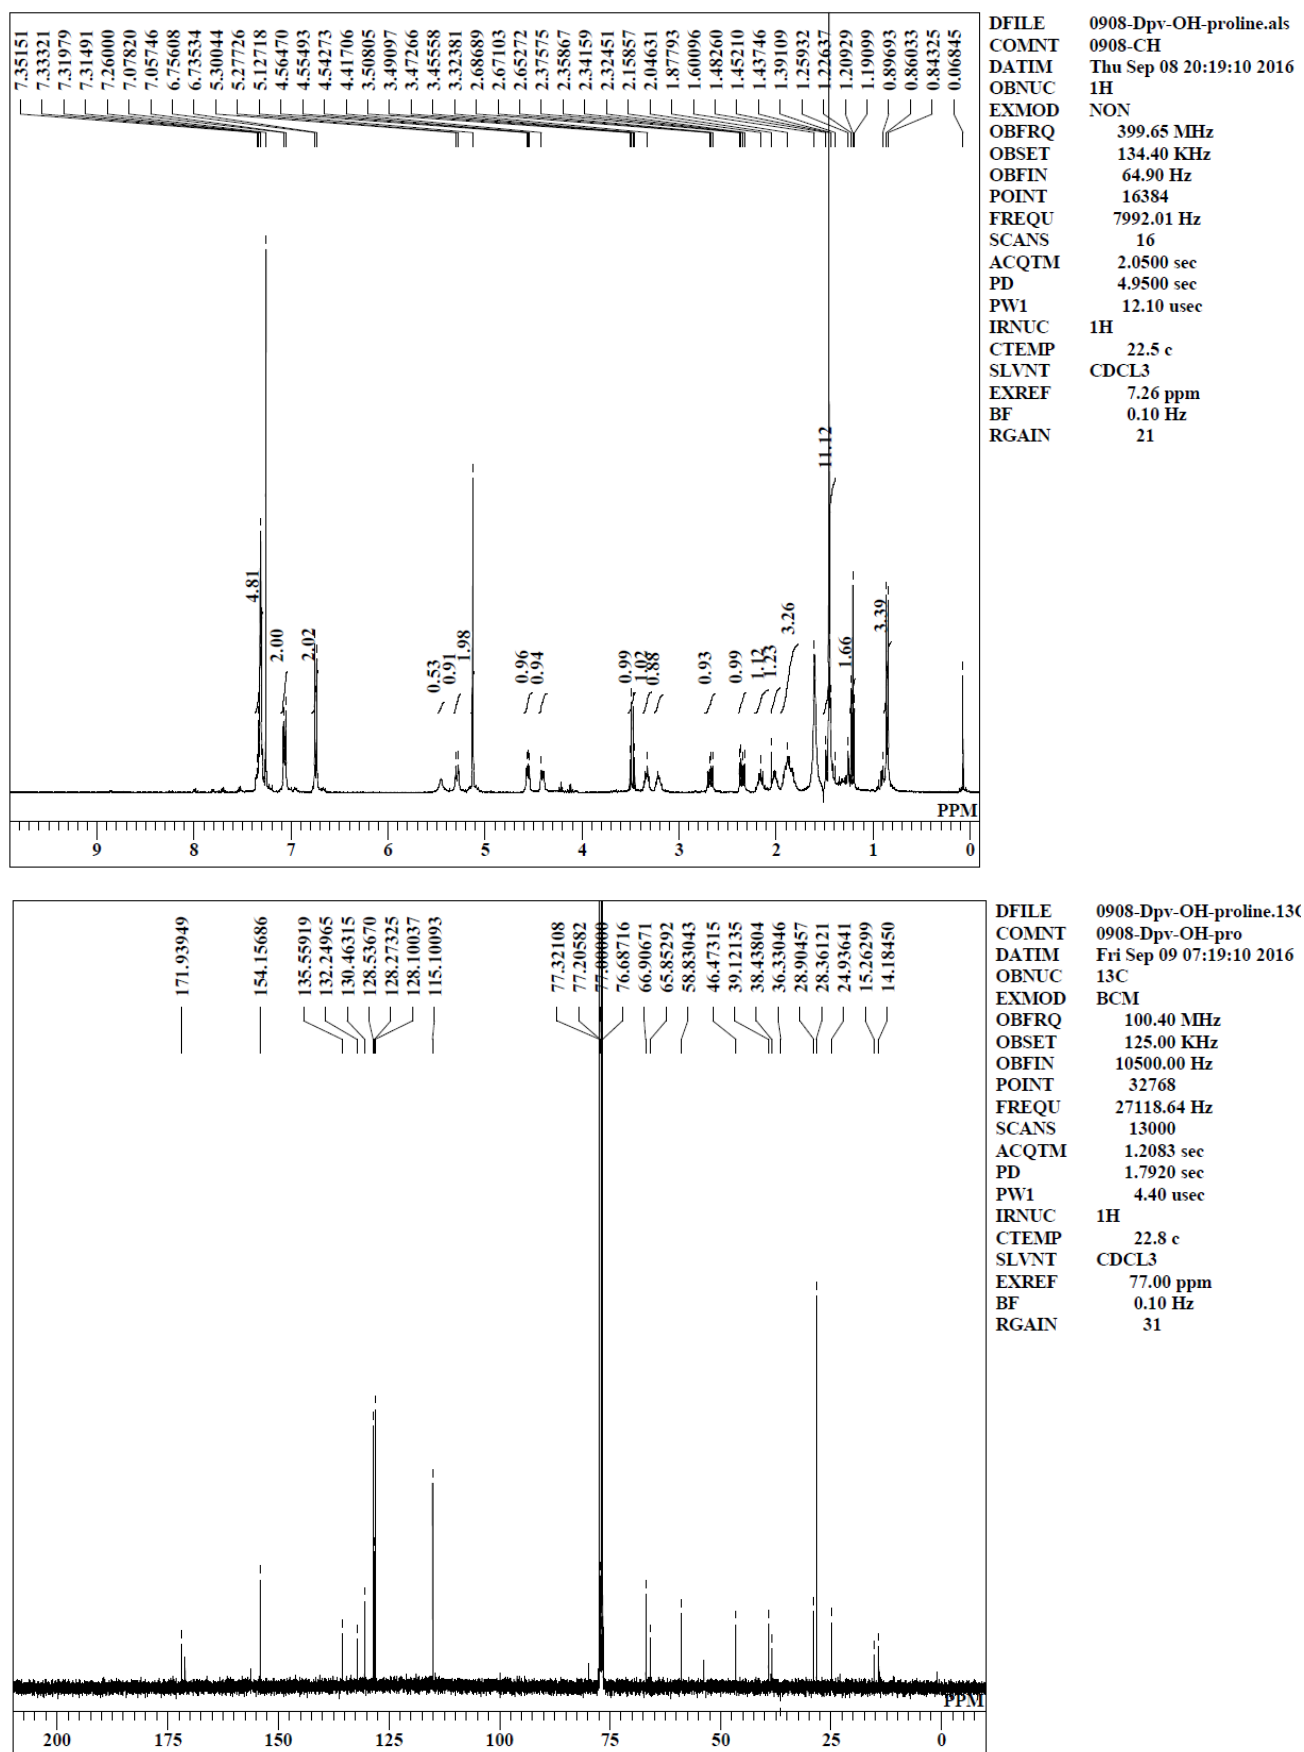

**Figure S7.** <sup>1</sup>H and <sup>13</sup>C NMR spectra of compound **17**

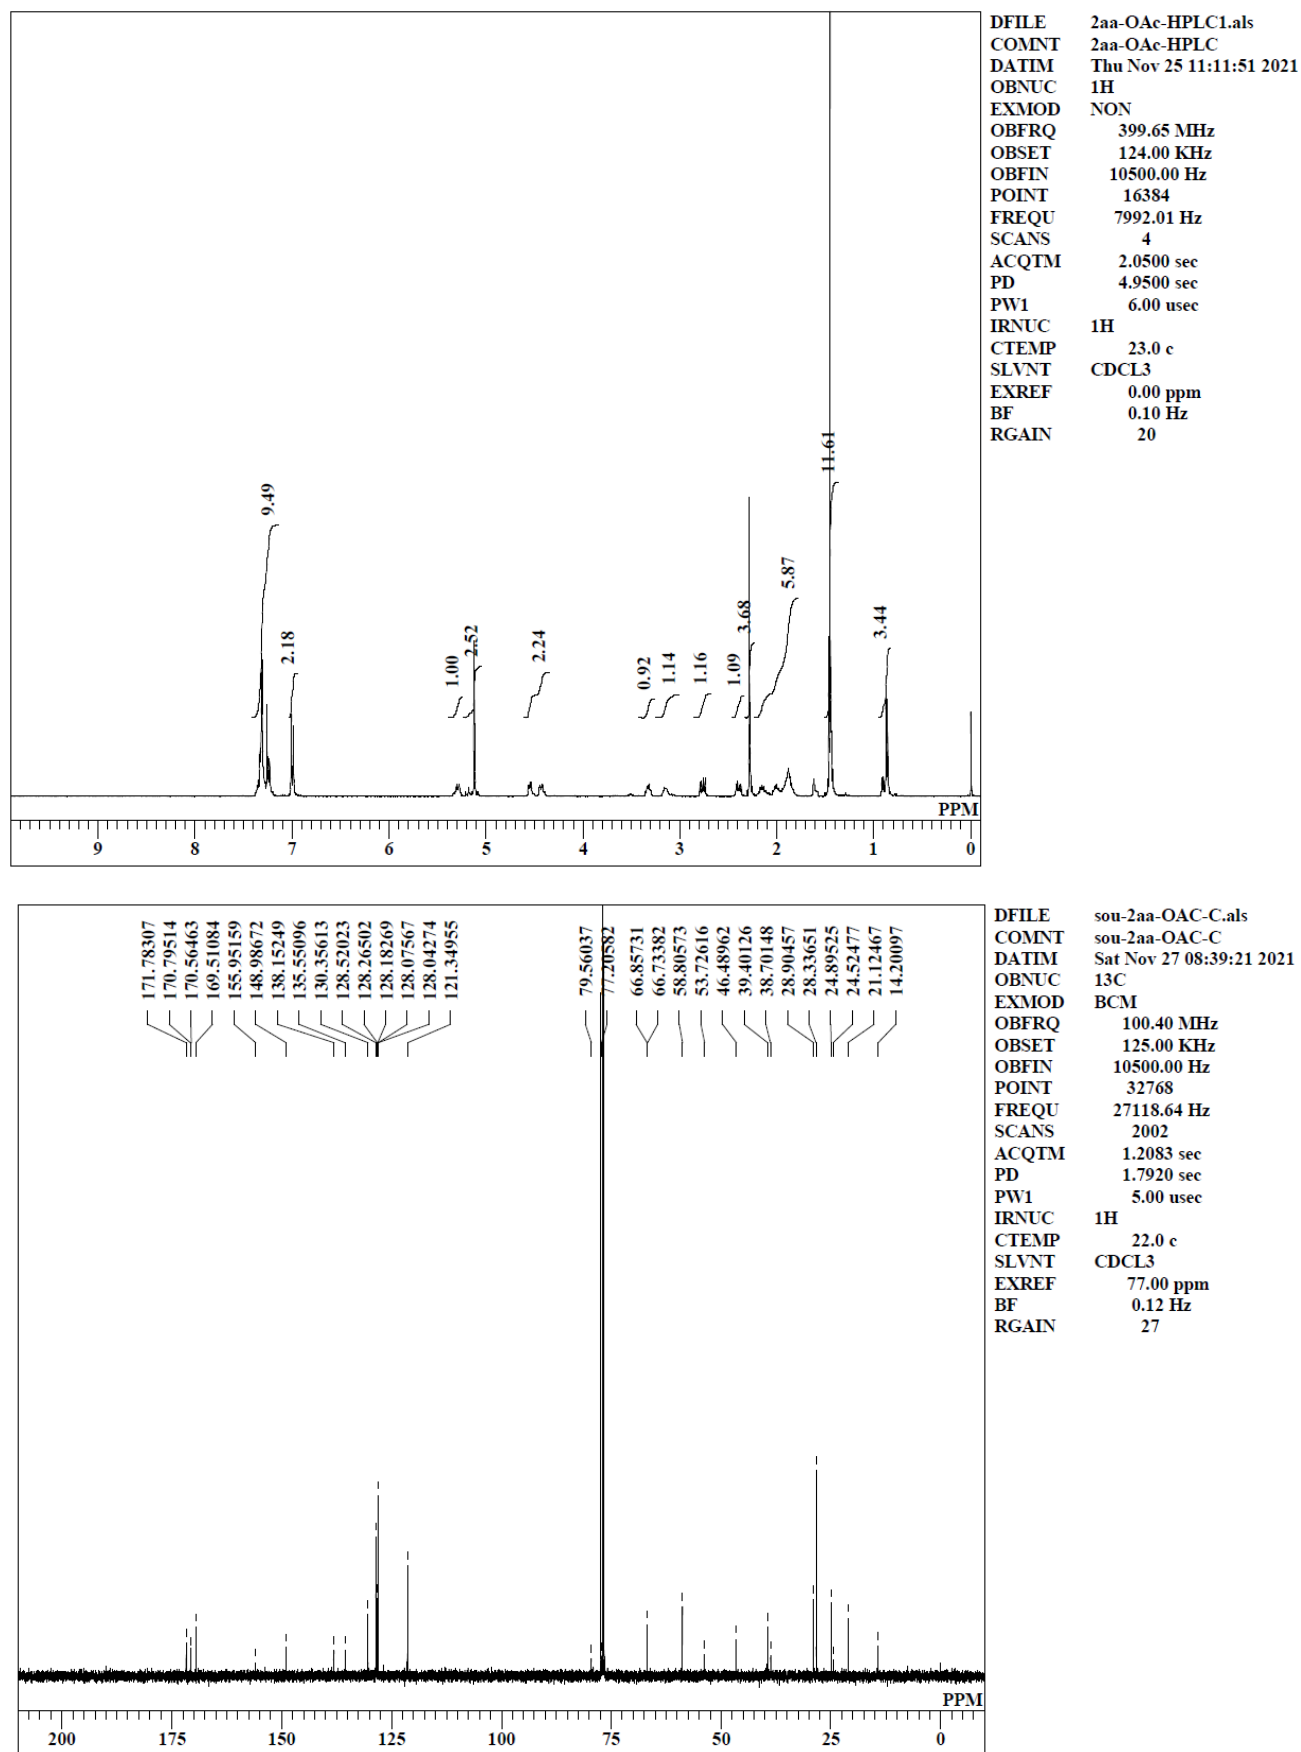



**Figure S8.**  $^1\text{H}$  and  $^{13}\text{C}$  NMR spectra of compound **20**

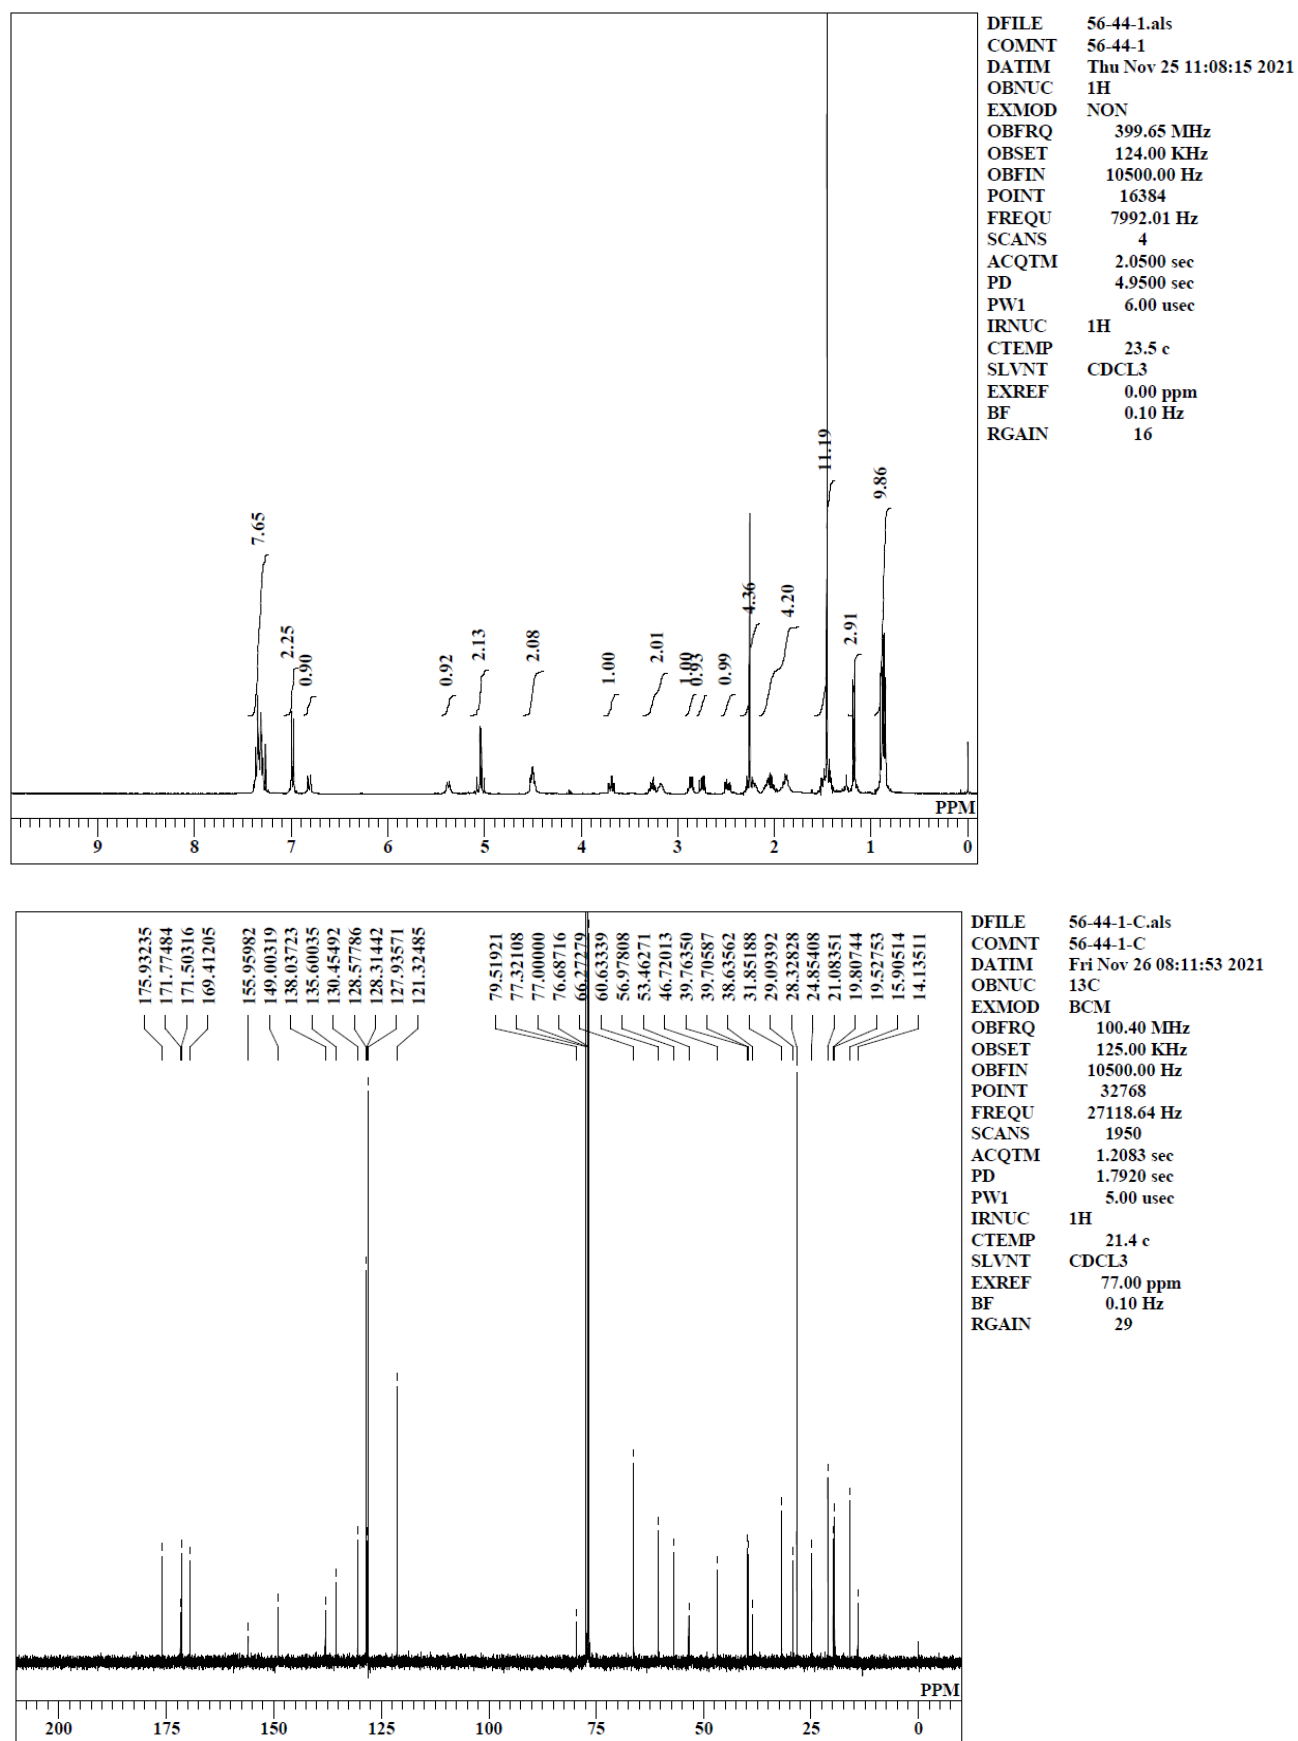

Figure S9. <sup>1</sup>H and <sup>13</sup>C NMR spectra of compound 21

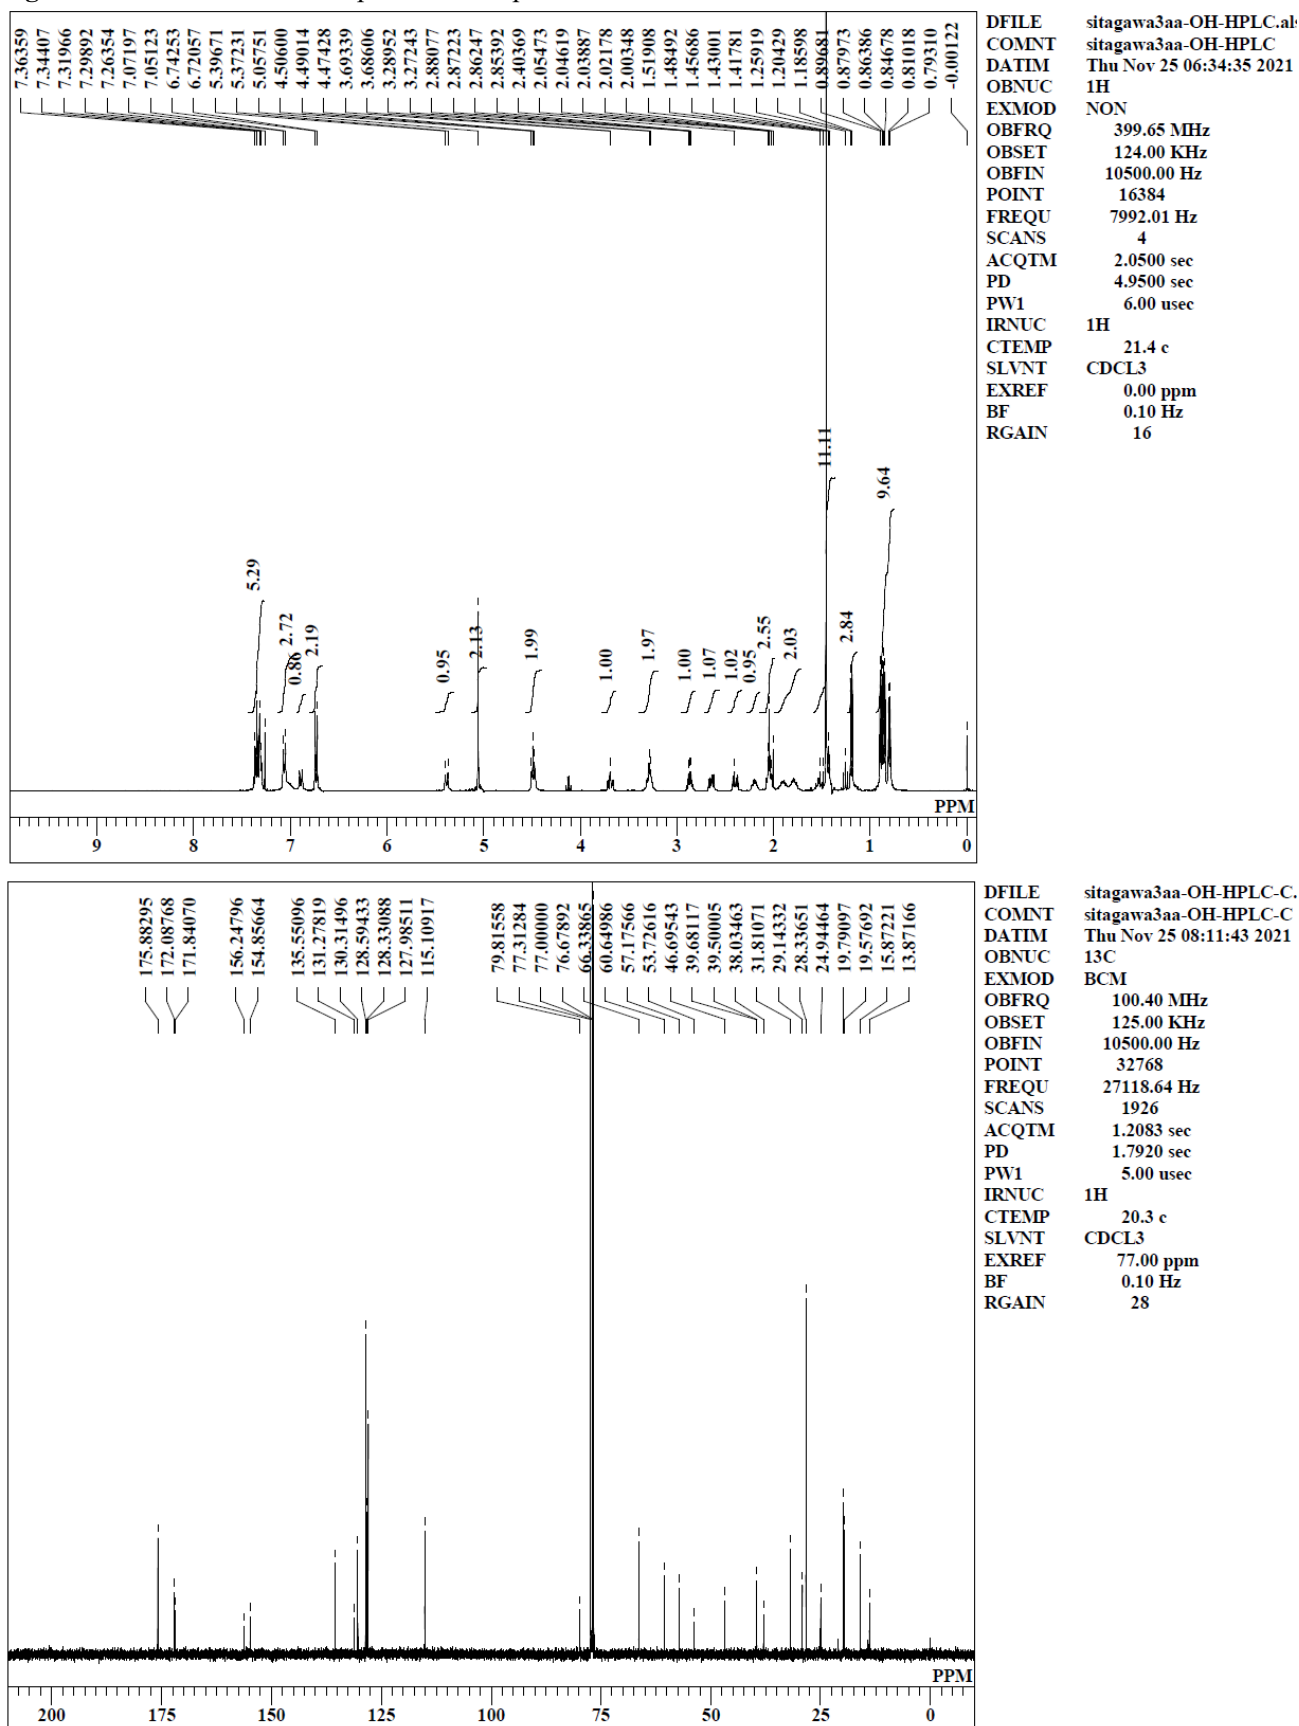

**Figure S10.** <sup>1</sup>H and <sup>13</sup>C NMR spectra of compound 22

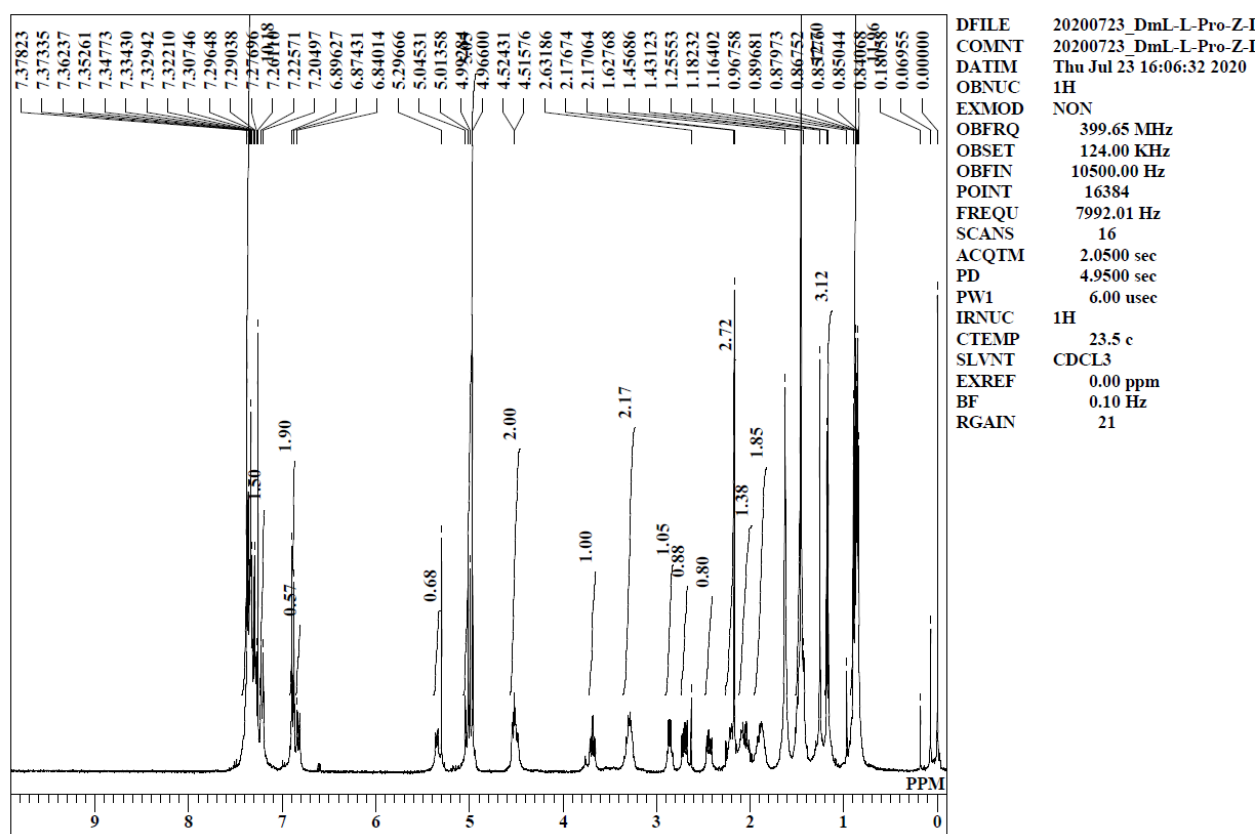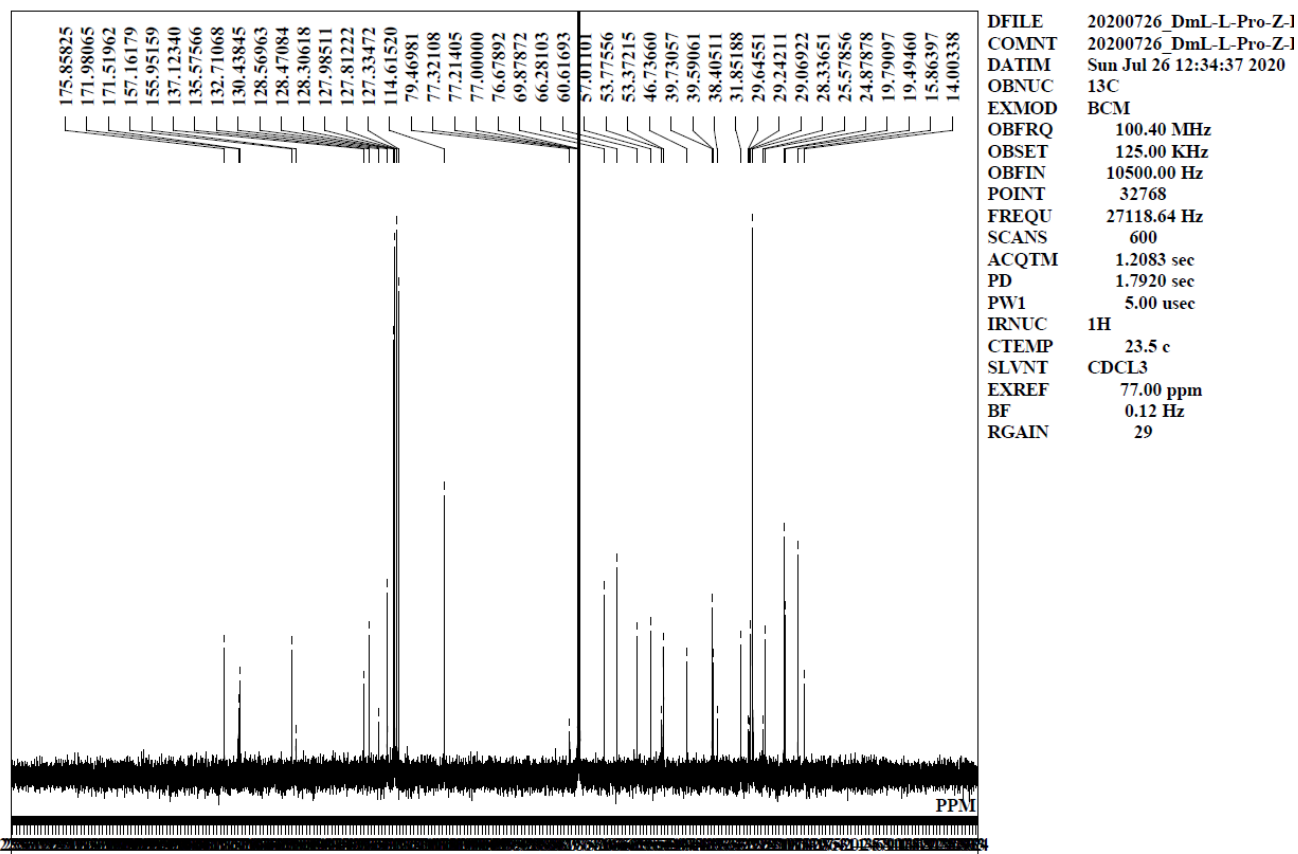

Figure S11. <sup>1</sup>H and <sup>13</sup>C NMR spectra of compound 23

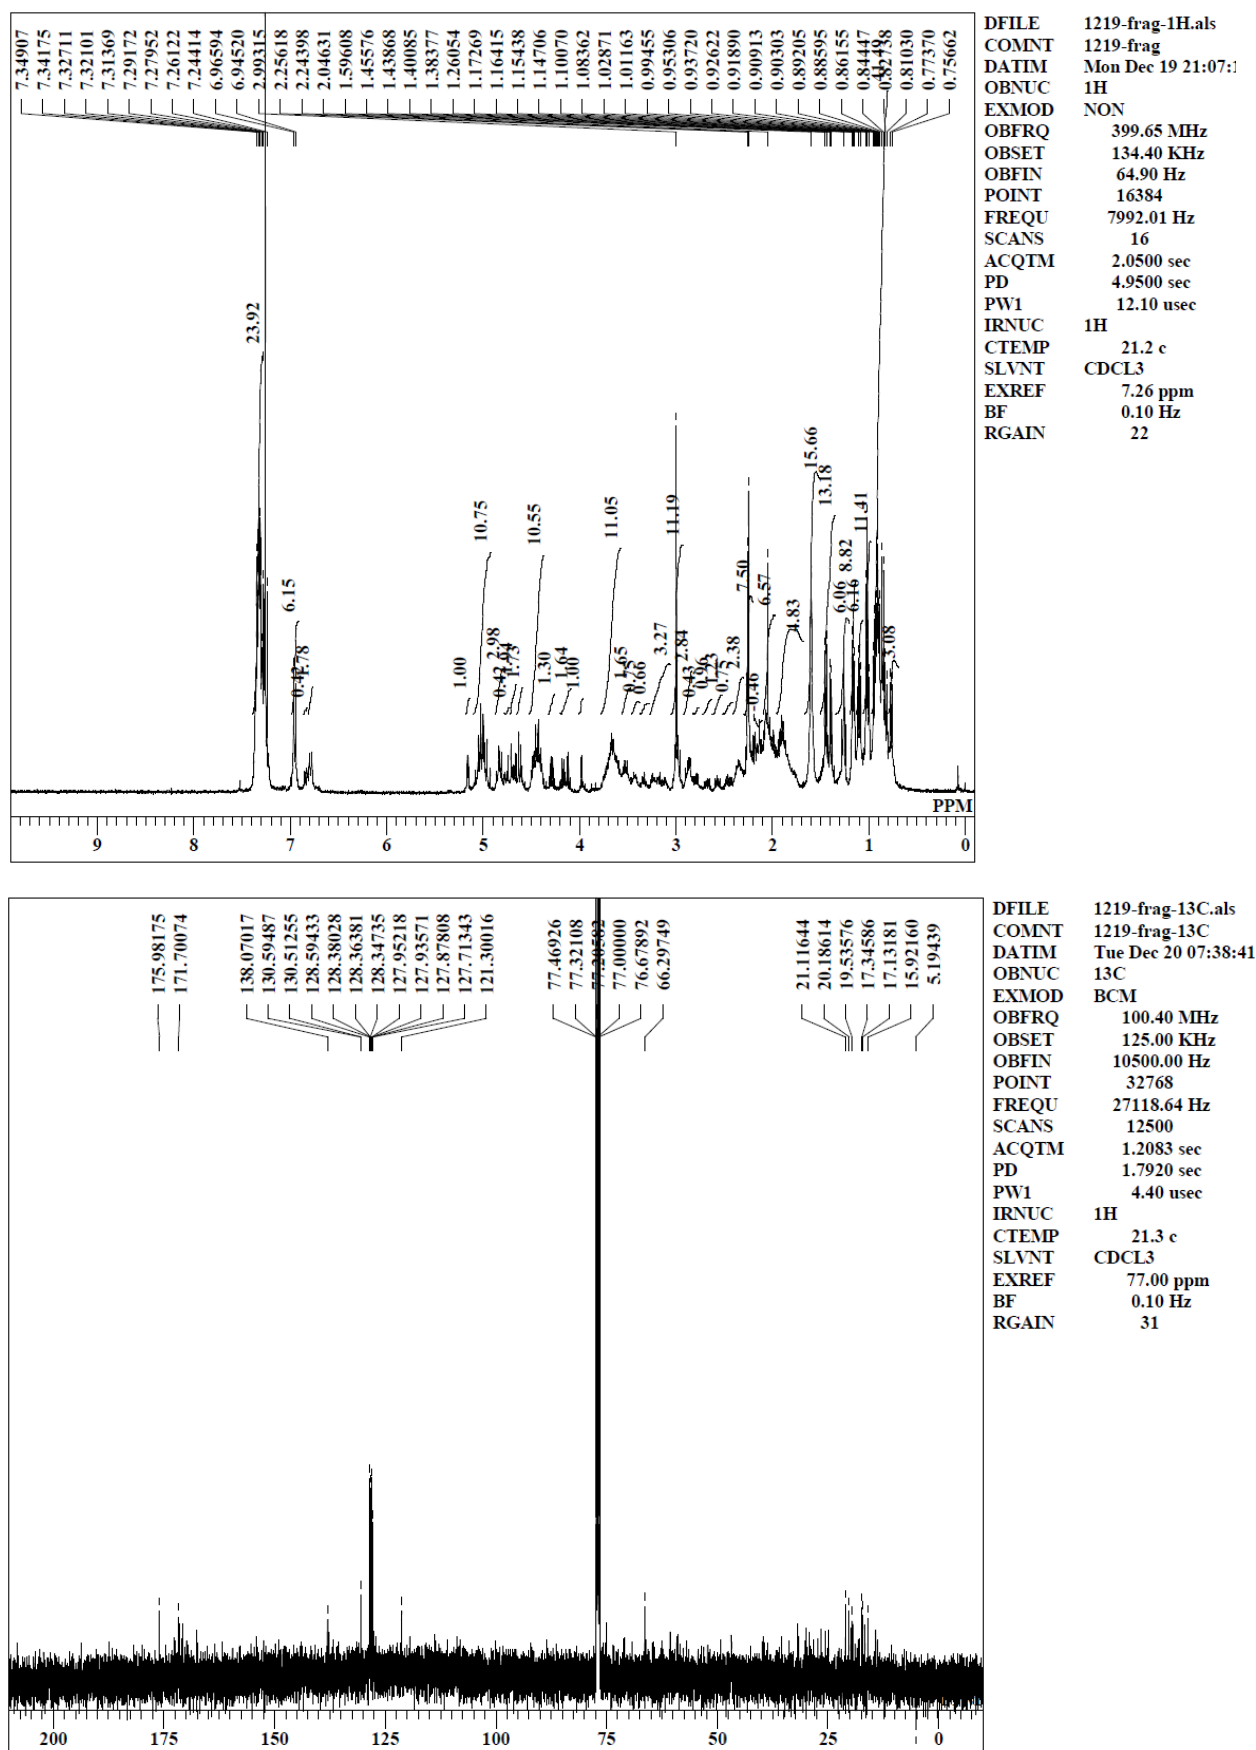

Figure S12. <sup>1</sup>H and <sup>13</sup>C NMR spectra of compound 24

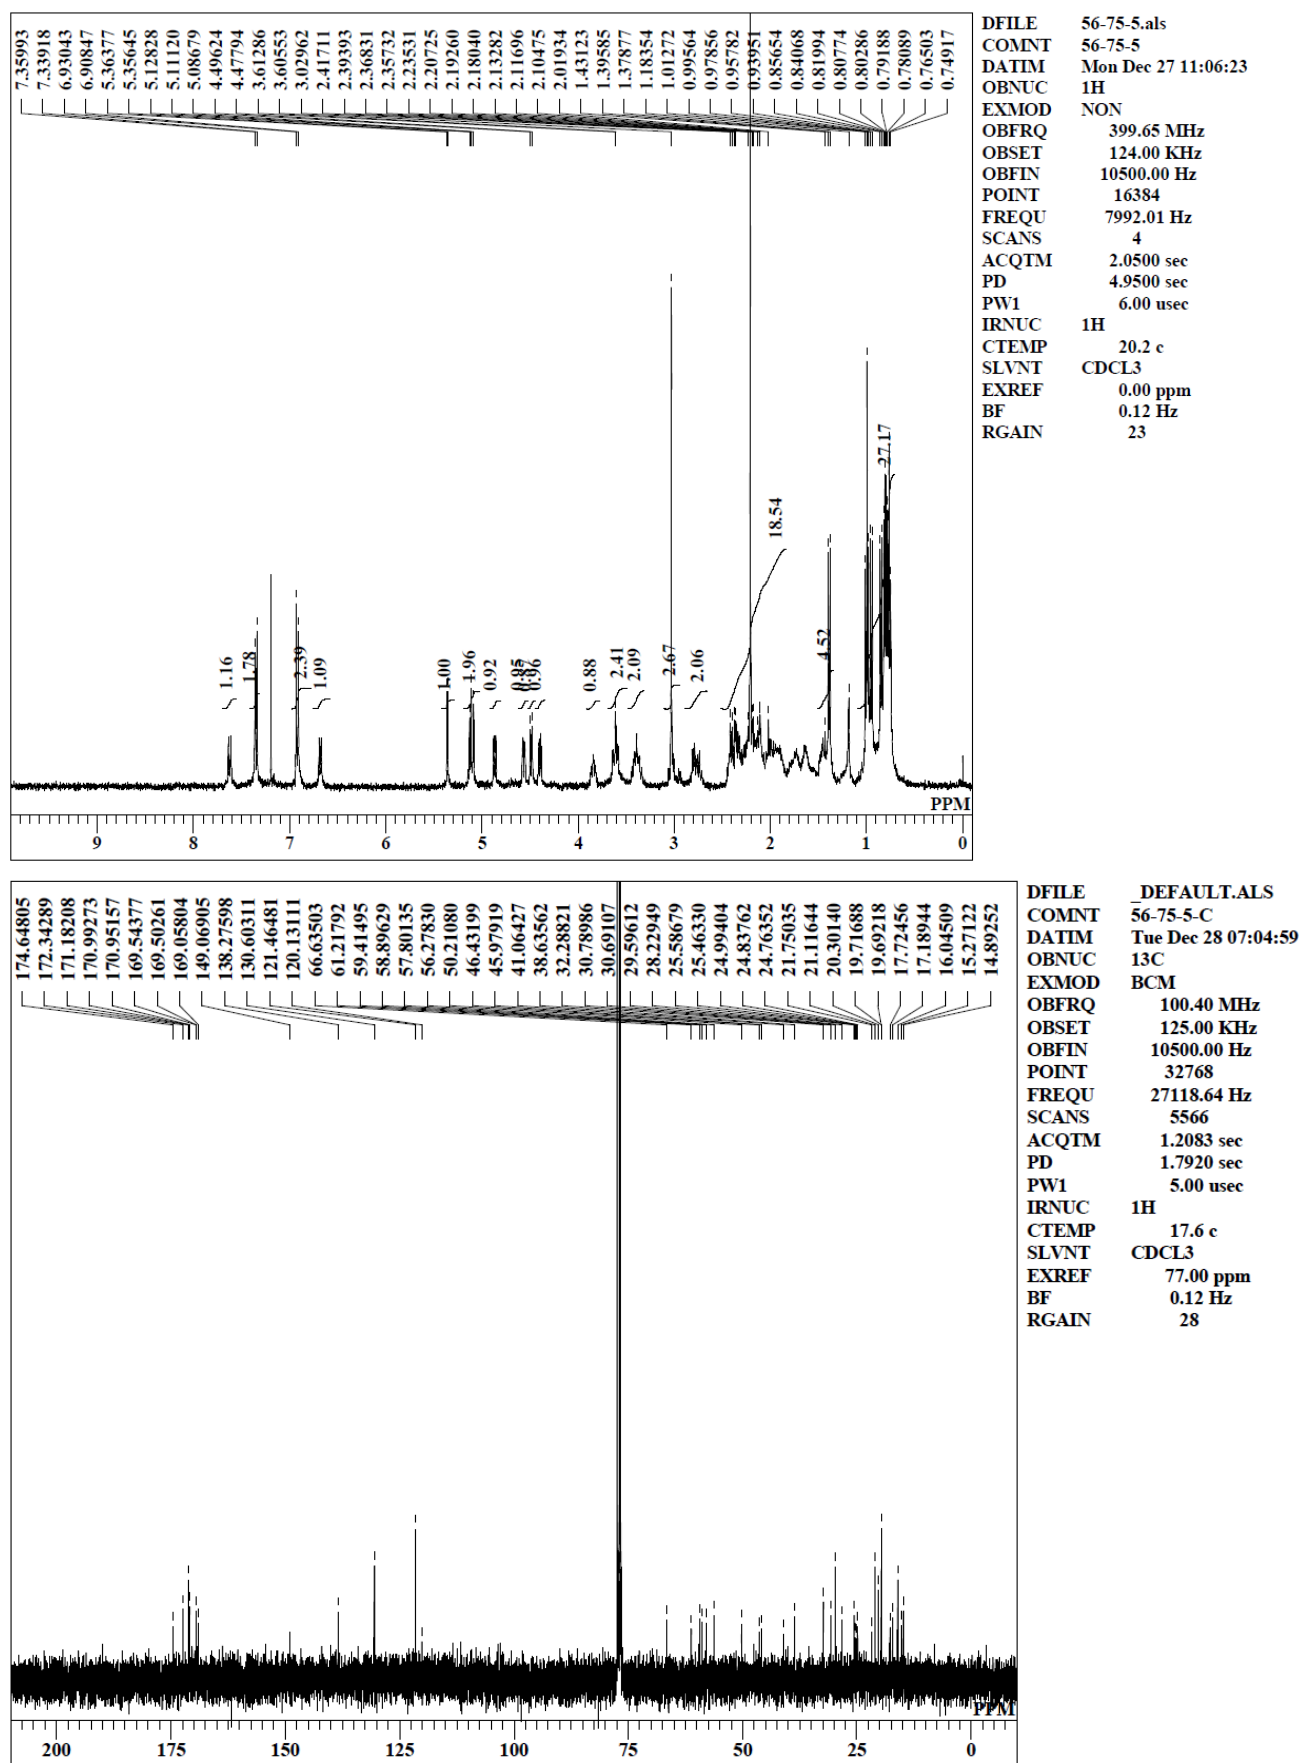

**<sup>1</sup>H NMR spectrum (top):** The spectrum shows peaks in the aromatic region (6.5-7.5 ppm), a methine region (3.5-4.5 ppm), and an aliphatic region (1.0-2.5 ppm). Integration values are shown above the peaks: 10.69 for the aromatic region and 3.00 for the methine region. The x-axis is labeled PPM and ranges from 0 to 9.

**<sup>13</sup>C NMR spectrum (bottom):** The spectrum shows peaks from 15.97 to 172.08 ppm. The x-axis is labeled PPM and ranges from 0 to 200.

**Acquisition Parameters:**

| Parameter | Value                    |
|-----------|--------------------------|
| DFILE     | 56-45-2.als              |
| COMNT     | 56-45-2                  |
| DATIM     | Mon Nov 29 08:16:22 2021 |
| OBNUC     | <sup>1</sup> H           |
| EXMOD     | NON                      |
| OBFRQ     | 399.65 MHz               |
| OBSET     | 124.00 KHz               |
| OBFIN     | 10500.00 Hz              |
| POINT     | 16384                    |
| FREQU     | 7992.01 Hz               |
| SCANS     | 4                        |
| ACQTM     | 2.0500 sec               |
| PD        | 4.9500 sec               |
| PW1       | 6.00 usec                |
| IRNUC     | <sup>1</sup> H           |
| CTEMP     | 21.7 c                   |
| SLVNT     | CDCL3                    |
| EXREF     | 0.00 ppm                 |
| BF        | 0.12 Hz                  |
| RGAIN     | 22                       |

**Acquisition Parameters:**

| Parameter | Value                    |
|-----------|--------------------------|
| DFILE     | 56-45-2-C.als            |
| COMNT     | 56-45-2-C                |
| DATIM     | Sat Dec 04 07:30:55 2021 |
| OBNUC     | <sup>13</sup> C          |
| EXMOD     | BCM                      |
| OBFRQ     | 100.40 MHz               |
| OBSET     | 125.00 KHz               |
| OBFIN     | 10500.00 Hz              |
| POINT     | 32768                    |
| FREQU     | 27118.64 Hz              |
| SCANS     | 11775                    |
| ACQTM     | 1.2083 sec               |
| PD        | 1.7920 sec               |
| PW1       | 5.00 usec                |
| IRNUC     | <sup>1</sup> H           |
| CTEMP     | 21.2 c                   |
| SLVNT     | CDCL3                    |
| EXREF     | 77.00 ppm                |
| BF        | 0.12 Hz                  |
| RGAIN     | 28                       |

**Figure S14.**  $^1\text{H}$  and  $^{13}\text{C}$  NMR spectra of compound **29**

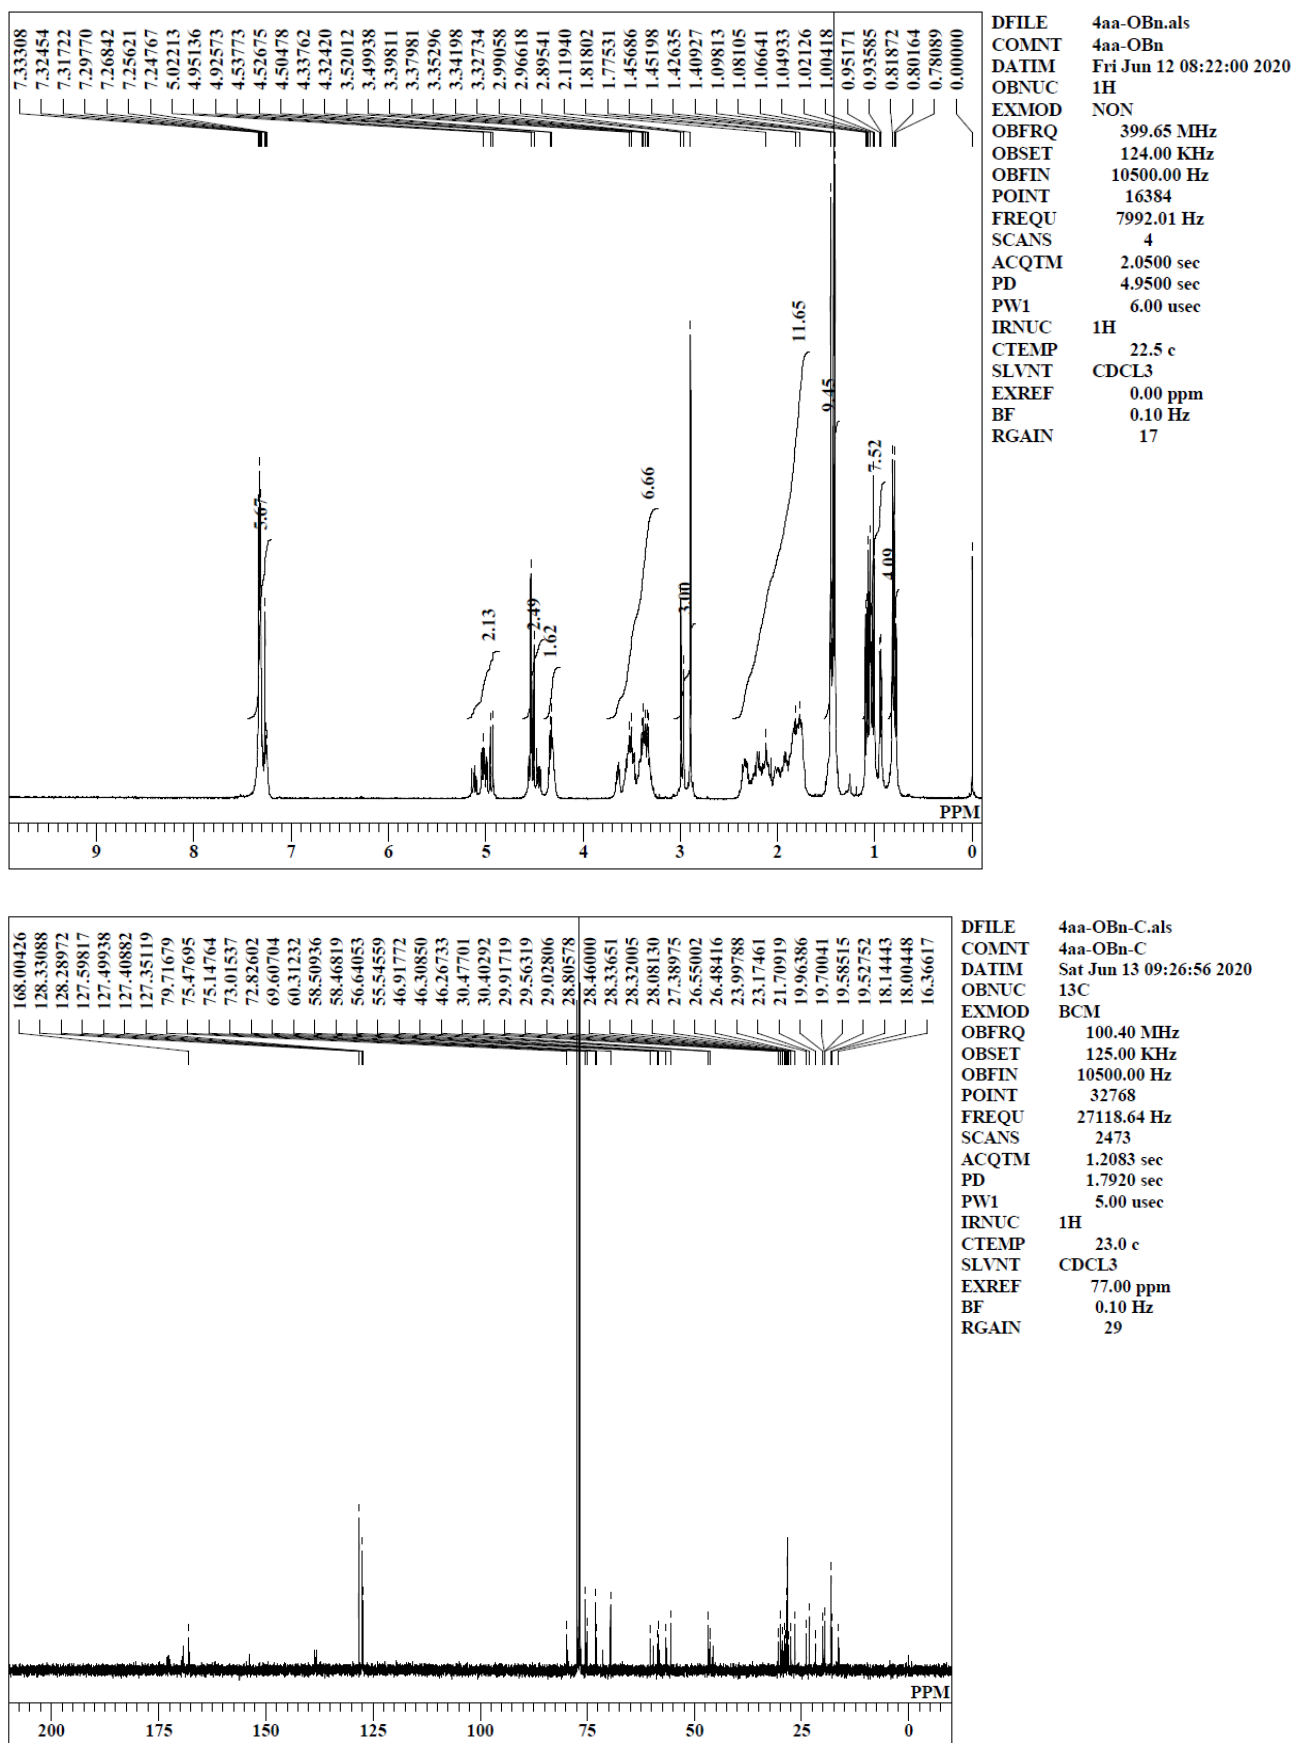

Supplement: s1 [file s1]
